# Supplementary material for: Characterization of cotton ARF factors and the role of GhARF2b in fiber development
Source: PubMed Central journal article supplement (PMC7986310; doi:10.1186/s12864-021-07504-6), 2021-03-22
Supplement: 12864_2021_7504_MOESM2_ESM.pdf [file 12864_2021_7504_MOESM2_ESM.pdf]

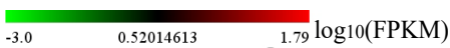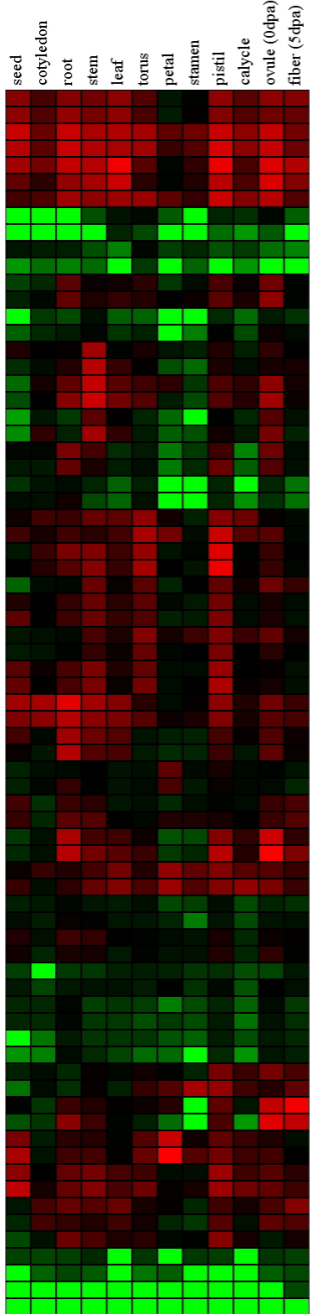

- GhARF1\_A
- GhARF1\_D
- GhARF2a\_A
- GhARF2a\_D
- GhARF2b\_A
- GhARF2b\_D
- GhARF2c\_D
- GhARF2d\_A
- GhARF2d\_D
- GhARF2e\_A
- GhARF2e\_D
- GhARF3a\_A
- GhARF3a\_D
- GhARF3b\_A
- GhARF3b\_D
- GhARF3c\_A
- GhARF3c\_D
- GhARF4a\_A
- GhARF4a\_D
- GhARF4b\_A
- GhARF4b\_D
- GhARF5a\_A
- GhARF5a\_D
- GhARF5b\_A
- GhARF5b\_D
- GhARF6a\_A
- GhARF6a\_D
- GhARF6b\_A
- GhARF6b\_D
- GhARF8a\_D
- GhARF8b\_A
- GhARF8b\_D
- GhARF8c\_A
- GhARF8c\_D
- GhARF8d\_A
- GhARF8d\_D
- GhARF9a\_A
- GhARF9a\_D
- GhARF9b\_A
- GhARF9b\_D
- GhARF10a\_A
- GhARF10a\_D
- GhARF10b\_A
- GhARF10b\_D
- GhARF11\_A
- GhARF11\_D
- GhARF16a\_A
- GhARF16a\_D
- GhARF16b\_A
- GhARF16b\_D
- GhARF16c\_A
- GhARF16c\_D
- GhARF16d\_A
- GhARF16d\_D
- GhARF17a\_A
- GhARF17a\_D
- GhARF17b\_A
- GhARF17b\_D
- GhARF18a\_A
- GhARF18a\_D
- GhARF18b\_A
- GhARF18b\_D
- GhARF19.1a\_A
- GhARF19.1a\_D
- GhARF19.1b\_A
- GhARF19.1b\_D
- GhARF19.2\_A
- GhARF19.2\_D
- GhARF20\_A
- GhARF21\_D
- GhARF21a\_D
- GhARF21b\_D
- GhARF22
